# Supplementary material
Source: publisher figshare collection journal article supplement (https://sage.figshare.com/ndownloader/files/17709977)
Supplement: Supplementary file 1 [file 17709977]

Supplement 1:

**Multiple Choice Assessment Answers**

Question 1: D) Stoma only

Question 2: D) Attempt orotracheal intubation

Question 3: C) Asphyxiation

Question 4: A) 8 Cuffed

Question 5: A) Check if cuff is inflated

Question 6: D) Facilitating a safe and successful tracheostomy change

Question 7: A) Remove cap on trach tube

Question 8: C) Remove the inner cannula from the tracheostomy tube

Question 9: C) Inform the nurse that this is impossible in this patient

Question 10: C) False passage
